# Supplementary material
Source: publisher figshare collection journal article supplement (https://gsajournals.figshare.com/ndownloader/files/15381104)
Supplement: Supplementary file 1 [file 15381104]

**Table S2. Transcript counts**

| Transcript | Count | Source |
| --- | --- | --- |
| mRNA | 6600 | SGD |
| snoRNA | 77 | SGD |
| CUT | 925 | Xu et al., 2009 |
| SUT | 847 | Xu et al., 2009 |
| NUT | 1526 | Schulz et al., 2013 |
| XUT | 1657 | van Dijk et al., 2011 |
| SRAT | 532 | Venkatesh et al., 2016 |
| Sum | 12164 |  |

Count refers to the number of transcripts in each class assessed in this study. Sources of transcript annotations are listed.
